# Supplementary material for: Efficacy and safety analysis of trastuzumab and paclitaxel based regimen plus carboplatin or epirubicin as neoadjuvant therapy for clinical stage II-III, HER2-positive breast cancer patients: a phase 2, open-label, multicenter, randomized trial
Source: PubMed Central journal article supplement (PMC4621920; doi:10.18632/oncotarget.4337), 2015-06-02
Supplement: oncotarget-06-18683-s001.pdf [file oncotarget-06-18683-s001.pdf]

# Efficacy and safety analysis of trastuzumab and paclitaxel based regimen plus carboplatin or epirubicin as neoadjuvant therapy for clinical stage II-III, HER2-positive breast cancer patients: a phase 2, open-label, multicenter, randomized trial

## Supplementary Material

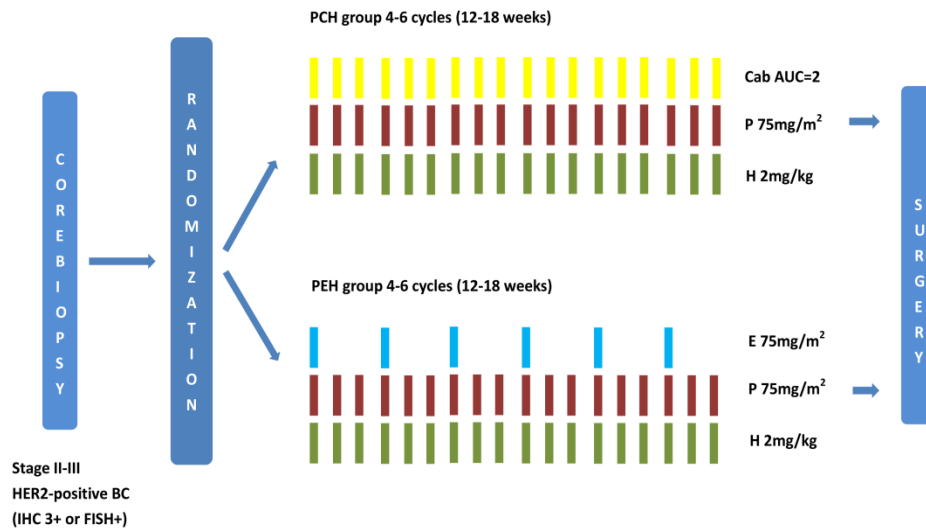

S.Figure 1: Treatment plan

Abbreviations: AUC, area under the concentration-time curve; BC, breast cancer; Car, carboplatin; FISH, fluorescence in situ hybridization; H, trastuzumab; IHC, immunohistochemistry; P, paclitaxel.

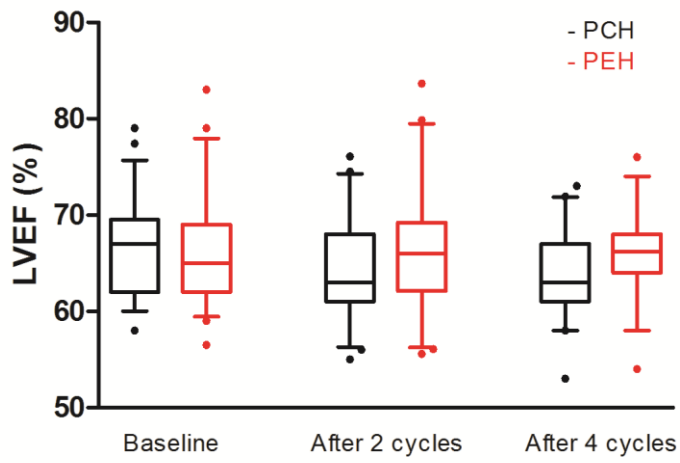

S.Figure 2: Left ventricular ejection fraction (LVEF) per treatment arm.

Central horizontal lines show medians, limits of shaded boxes show 50th percentile, horizontal lines outside

S.Table 1: Odds ratios for pathological complete response according to subgroups

|                            | Category               | Univariable            |         | Multivariable           |         |
|----------------------------|------------------------|------------------------|---------|-------------------------|---------|
|                            |                        | Odds ratio<br>(95% CI) | P value | Odds ratio<br>(95% CI)  | P value |
| <b>Arm</b>                 | PCH vs PEH             | 1.481<br>(0.632-3.472) | 0.365   | 3.606<br>(1.153-11.274) | 0.027   |
| <b>Age</b>                 | <45y vs ≥45y           | 1.218<br>(0.504-2.945) | 0.662   | 1.053<br>(0.338-3.279)  | 0.930   |
| <b>cT</b>                  | cT1-2 vs cT3-4         | 0.490<br>(0.19q-1.258) | 0.135   | 0.407<br>(0.134-1.232)  | 0.112   |
| <b>cN</b>                  | Negative vs positive   | 0.721<br>(0.212-2.447) | 0.599   | 0.332<br>(0.054-2.057)  | 0.236   |
| <b>Ki67</b>                | <14% vs ≥14%           | 1.737<br>(0.479-6.295) | 0.397   | 2.483<br>(0.407-15.153) | 0.324   |
| <b>HR status</b>           | Negative vs positive   | 0.607<br>(0.259-1.426) | 0.251   | 0.550<br>(0.177-1.711)  | 0.302   |
| <b>Chemotherapy cycles</b> | 4 cycles vs 5-6 cycles | 1.364<br>(0.583-3.190) | 0.474   | 2.671<br>(0.881-8.794)  | 0.106   |
| <b>FCGR2A</b>              | H/H vs H/R and R/R     | 0.561<br>(0.224-1.406) | 0.216   | 0.330<br>(0.098-1.110)  | 0.073   |
| <b>FCGR3A</b>              | F/F vs F/V and V/V     | 1.294<br>(0.521-3.214) | 0.578   | 1.348<br>(0.432-4.209)  | 0.607   |
| <b>PIK3CA</b>              | Wild type vs mutated   | 0.799<br>(0.316-2.024) | 0.637   | 0.799<br>(0.250-2.550)  | 0.705   |
| <b>TP53</b>                | Wild type vs mutated   | 1.404<br>(0.558-3.533) | 0.471   | 0.813<br>(0.235-2.808)  | 0.743   |
| <b>PTEN</b>                | Normal vs Loss         | 1.103<br>(0.378-3.219) | 0.857   | 0.694<br>(0.159-3.024)  | 0.627   |

S.Table 2: Cardiac and most common adverse events reported as possibly, probably, or definitely related to treatment

| Adverse event            | HPC group (N=50) |           | HPE group (N=50) |           |
|--------------------------|------------------|-----------|------------------|-----------|
|                          | Grade 1/2        | Grade 3/4 | Grade 1/2        | Grade 3/4 |
| Anemia                   | 30               | 7         | 33               | 5         |
| Febrile neutropenia      | 0                | 4         | 0                | 7         |
| Neutropenia              | 17               | 28        | 12               | 35        |
| Leucopenia               | 14               | 4         | 15               | 13        |
| Thrombocytopenia         | 10               | 3         | 5                | 1         |
| Granulocytopenia         | 22               | 23        | 20               | 26        |
| ALP increased            | 3                | 0         | 1                | 0         |
| Bilirubin increased      | 26               | 1         | 23               | 2         |
| AST increased            | 16               | 1         | 13               | 0         |
| ALT increased            | 22               | 4         | 22               | 0         |
| Hand-foot syndrome       | 3                | 0         | 9                | 0         |
| Diarrhea                 | 8                | 1         | 6                | 1         |
| Nausea                   | 29               | 0         | 31               | 0         |
| Vomiting                 | 23               | 0         | 21               | 0         |
| Fatigue                  | 24               | 0         | 22               | 1         |
| Peripheral neuropathy    | 6                | 0         | 7                | 0         |
| Arthralgia/myalgia       | 0                | 0         | 0                | 0         |
| Congestive heart failure | 0                | 0         | 0                | 0         |
| Palpitation              | 4                | 0         | 5                | 0         |
| Lung infection           | 1                | 1         | 1                | 1         |
